# Supplementary material
Source: Springer Nature journal article supplement (https://www.springermedizin.de/resource/supplementary/12968_2011_2570_MOESM8_ESM.pdf/9582252)

**Strongest 1<sup>o</sup> Risk Factors:**

- Familial Hx of SD**
- Syncope**
- Multiple-repetitive NSVT**
- ↓BP — exercise**
- Massive LVH ≥30 mm**

**ICD**

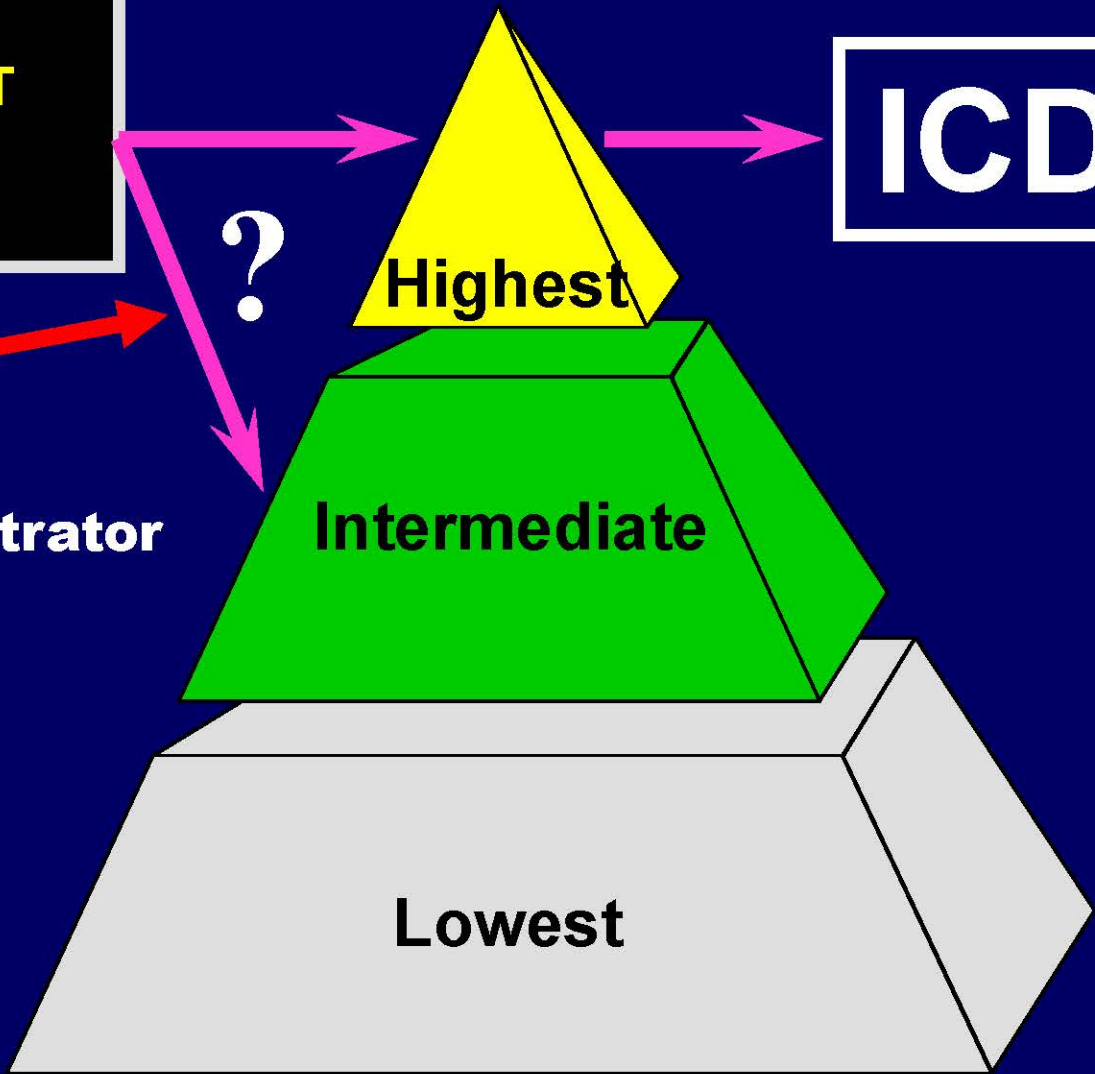

**Possible Arbitrator**

**LGE**

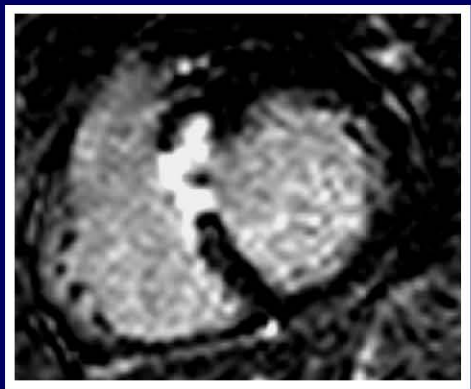

Supplement: MOESM8 [file 9582252]
